# Supplementary material for: Activation of the NLRP1b inflammasome independently of ASC-mediated caspase-1 autoproteolysis and speck formation
Source: PubMed Central journal article supplement — Nat Commun. 2014 Feb 4;5:3209. doi: 10.1038/ncomms4209 (PMC3926011; doi:10.1038/ncomms4209), 2014-02-04
Supplement: ncomms4209-s1.pdf [file ncomms4209-s1.pdf]

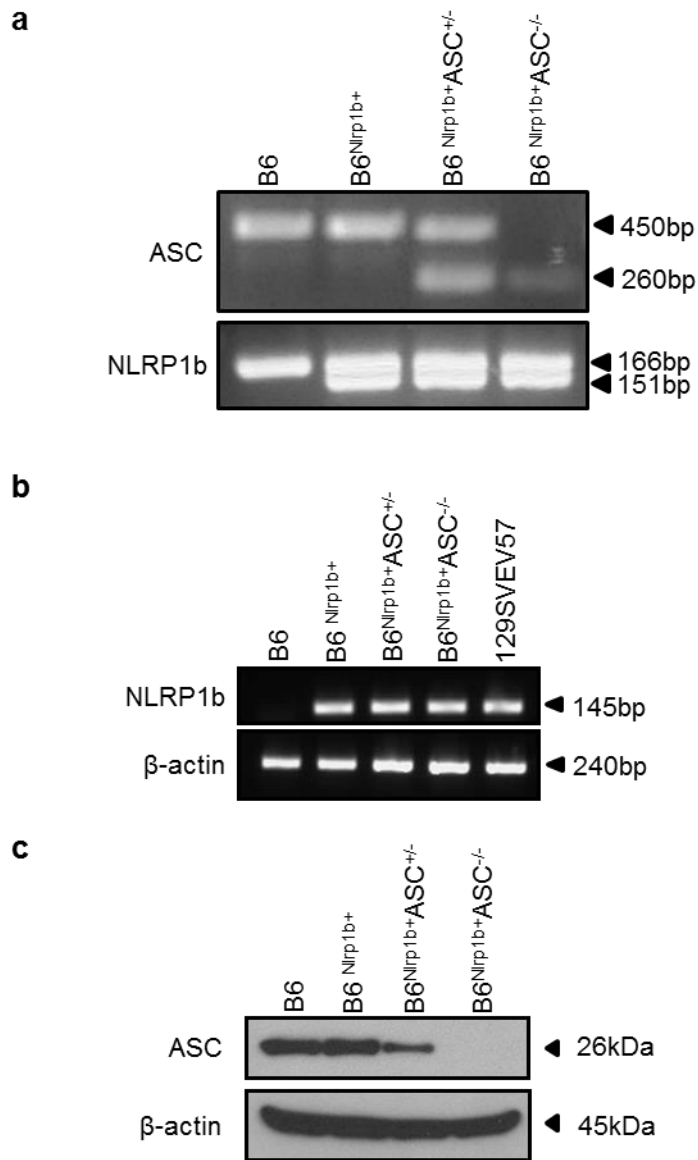

**Supplementary Figure 1. Genotyping and expression analysis of ASC and NLRP1b in mice and macrophages.** **a)** Genotyping for ASC and NLRP1b alleles on genomic DNA of B6, B6<sup>Nlrp1b+</sup>, B6<sup>Nlrp1b+ASC<sup>+/-</sup></sup> and B6<sup>Nlrp1b+ASC<sup>-/-</sup></sup> mouse tails. **b)** RT-PCR analysis of functional NLRP1b expression on cDNA from B6, B6<sup>Nlrp1b+</sup>, B6<sup>Nlrp1b+ASC<sup>+/-</sup></sup>, B6<sup>Nlrp1b+ASC<sup>-/-</sup></sup> and 129SVEV57 BMDMs. **c)** B6, B6<sup>Nlrp1b+</sup>, B6<sup>Nlrp1b+ASC<sup>+/-</sup></sup> and B6<sup>Nlrp1b+ASC<sup>-/-</sup></sup> BMDMs lysates were immunoblotted for the indicated proteins. Results are representative for 3 independent experiments.

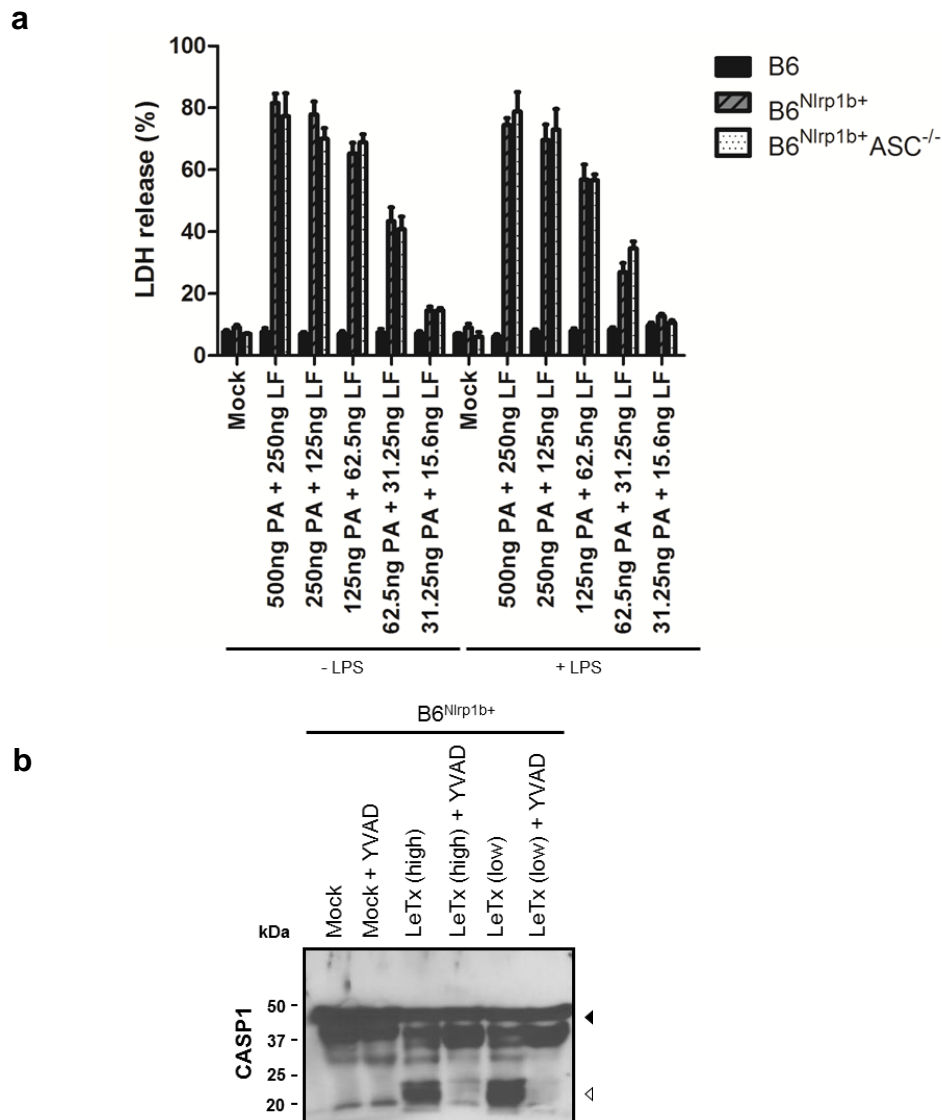

**Supplementary Figure 2. Dose-dependent cell death induction in LeTx-treated macrophages.** **a)** B6, B6<sup>Nlrp1b+</sup>, B6<sup>Nlrp1b+</sup> and B6<sup>Nlrp1b+</sup> ASC<sup>-/-</sup> BMDMs were left untreated or primed with 5  $\mu\text{g ml}^{-1}$  LPS prior to incubation with decreasing concentrations of LeTx for 3 h. LDH levels were determined in culture supernatants. Data are shown as mean  $\pm$  S.E.M. from two independent experiments, with each condition performed in triplicate in each experiment. **b)** LPS-primed B6<sup>Nlrp1b+</sup> BMDMs were pretreated with 50  $\mu\text{M}$  ac-YVAD-cmk for 30 min and then left untreated (Mock), or exposed to 10  $\mu\text{g}$  PA + 10  $\mu\text{g}$  LF (High) or to 500 ng PA + 250 ng LF (Low) for another 3 h. Cell lysates were immunoblotted for caspase-1. Results are representative for 3 independent experiments.

**a**

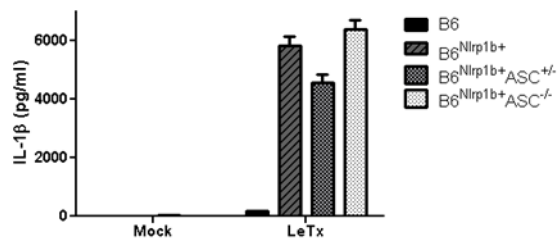

**b**

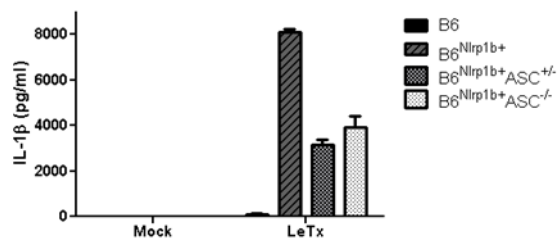

**Supplementary Figure 3. LeTx-induced IL-1 $\beta$  secretion at 24h post-treatment. a-b)** B6, B6<sup>Nlrp1b+</sup>, B6<sup>Nlrp1b+ASC<sup>+/-</sup></sup> and B6<sup>Nlrp1b+ASC<sup>-/-</sup></sup> BMDMs were primed with LPS (5  $\mu\text{g ml}^{-1}$  for 3 h) and then treated with LeTx (**a**, 10  $\mu\text{g PA}$  + 10  $\mu\text{g LF}$ ; **b**, 500 ng PA + 250 ng LF) for 24h. Secreted IL-1 $\beta$  was determined by ELISA assay, and data are shown as mean  $\pm$  S.D. from a single representative experiment out of 2, with each condition performed in triplicate.

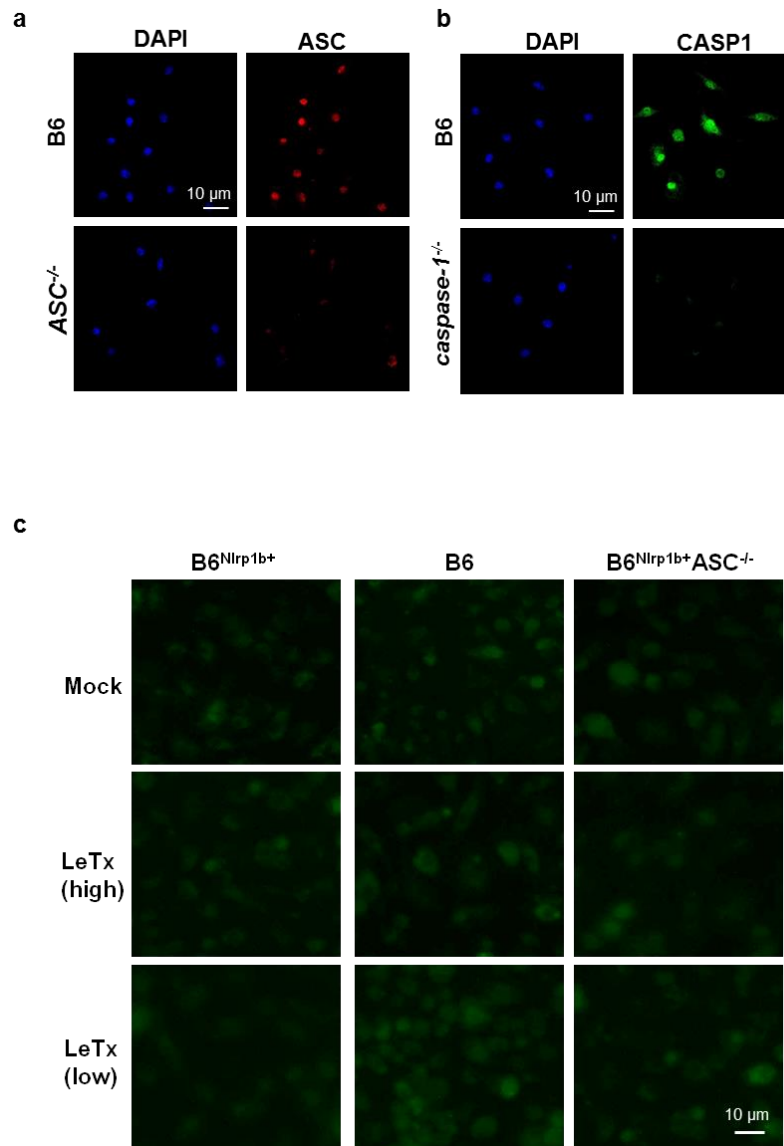

**Supplementary Figure 4. Control stainings in fluorescence and confocal microscopy. a)**

Untreated B6 and ASC<sup>-/-</sup> BMDMs were fixed and stained for ASC and mounted in ProLong

Gold Antifade reagent containing DAPI. **b)** Untreated B6 and caspase-1<sup>-/-</sup> BMDMs were fixed,

stained for caspase-1, and mounted in ProLong Gold Antifade reagent containing DAPI.

Micrographs were acquired by confocal microscopy at 60x magnification. **c)** Analysis of

autofluorescence by B6, B6<sup>Nlrp1b+</sup> and B6<sup>Nlrp1b+</sup>ASC<sup>-/-</sup> BMDMs that were treated with LeTx

(high, 10 μg PA + 10μg LF; low, 500 ng PA + 250 ng LF) for 30 min, and then incubated with

vehicle control (DMSO) for 45 min. Fluorescence micrographs were taken at 20x

magnification. Results are representative for 3 independent experiments.

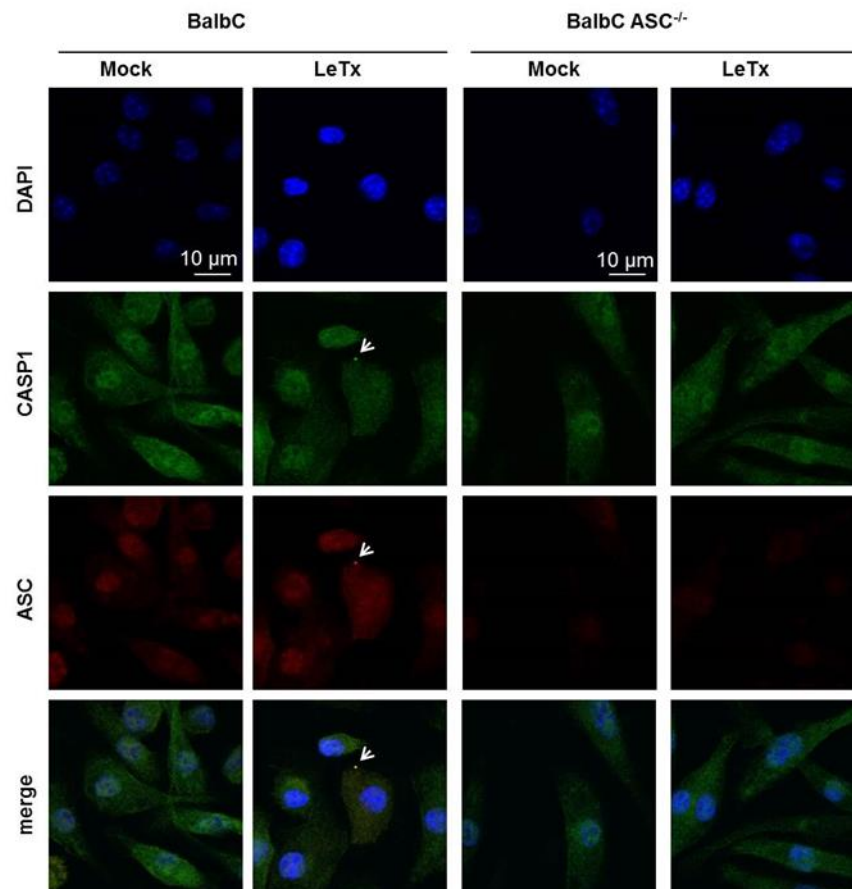

**Supplementary Figure 5. ASC is critical for LeTx-induced speck formation in BALB/c background.** BALB/c and BALB/c ASC<sup>-/-</sup> BMDMs were grown on coverslips and treated with LeTx (10 μg PA and LF, respectively) for 60 min after which cells were fixed in 4 % paraformaldehyde and immunostained for ASC (red) and caspase-1 (green). DAPI (blue) was included to localize nuclei. Arrows indicate specks. Confocal micrographs were acquired at 60x magnification. Results are representative for 3 independent experiments.

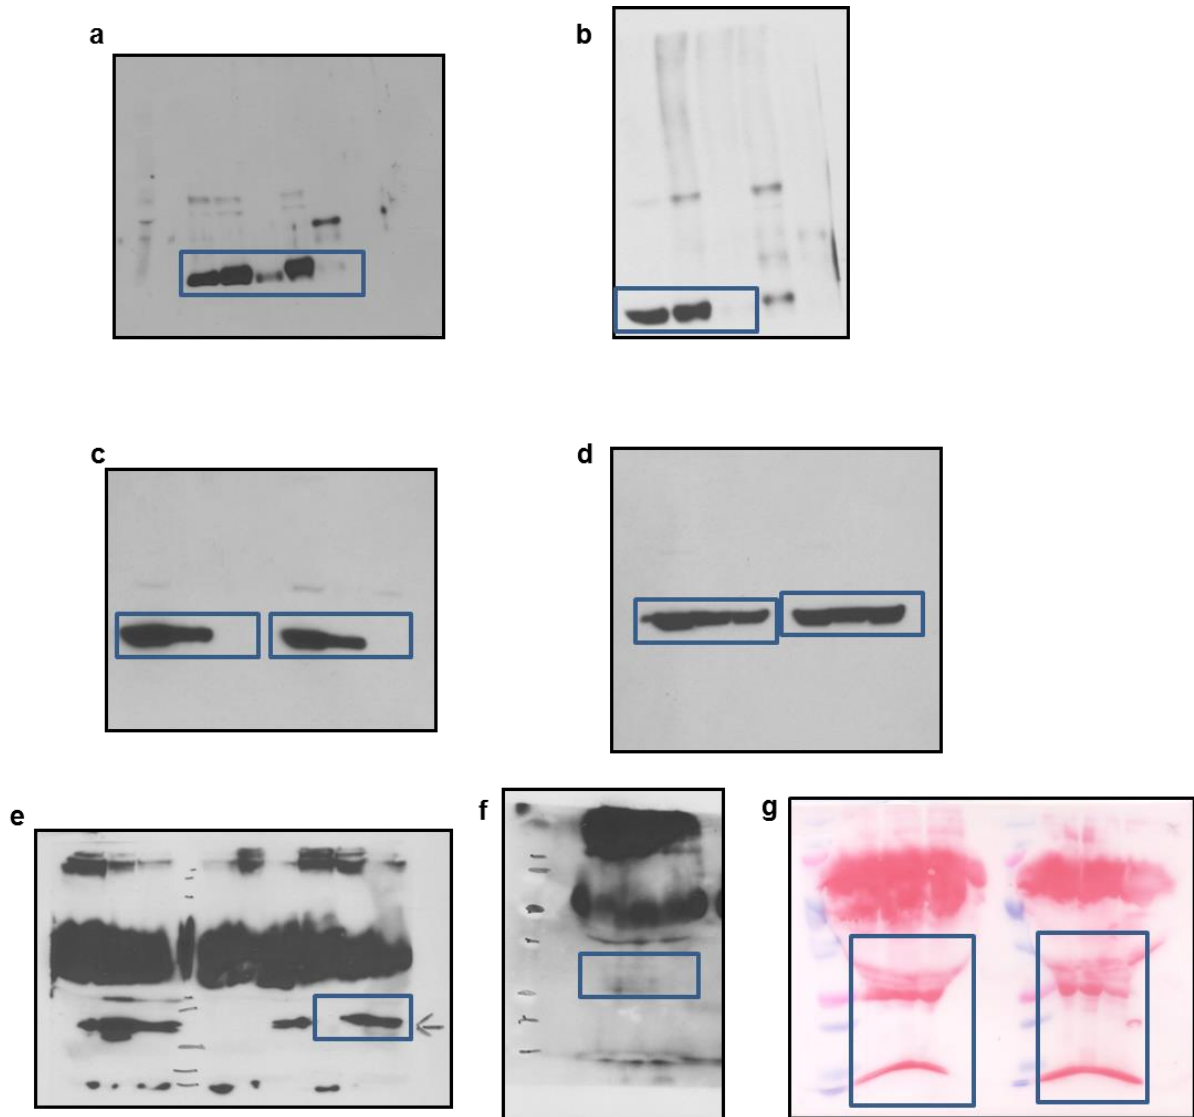

**Supplementary Figure 6. Uncropped scans of blots shown in figures 6 and 7. a-b)** shown are the blot scans used to generate a part of the panel of Fig. 6j and 6k, respectively. **c-g)** shown are the blot scans for the panels of Fig. 7a and 7b. The cropped areas used in the figures are marked by boxes.
